# Supplementary material
Source: MDPI journal article supplement (https://www.mdpi.com/1424-2818/13/8/346)
Supplement: s1 [file s1]

**Table S1.** Timing of small mammal trapping dates, trapping effort and main trapping results in the commensal habitats of Lithuania, 2019–2020.

| Year | Site 1 (homestead)                                                                                                                                               |     |     |   | Site 1 (kitchen garden)                                         |     |    |   |
|------|------------------------------------------------------------------------------------------------------------------------------------------------------------------|-----|-----|---|-----------------------------------------------------------------|-----|----|---|
|      | TD                                                                                                                                                               | TE  | N   | S | TD                                                              | TE  | N  | S |
| 2019 | 25–29 Jul; 07–09, 24–27 Aug; 17–18, 26–28 Sep; 01–02, 11–13, 15–17 Nov                                                                                           | 500 | 189 | 7 | 10–11 Aug; 9–11 Sep; 08–10, 20–21, 25–26 Oct                    | 220 | 62 | 4 |
| 2020 | 25 Mar; 07–09, 16–18, 22 Apr; 02, 21–22, 27–28 May; 03, 26–28 Jun; 16, 24–27 Jul; 04–06, 13–14, 22–25 Aug; 02–04, 14–17, 22–26 Sep; 06–07, 19–21, 31 Oct; 01–Nov | 980 | 170 | 8 | 28 Apr; 8–9, 17, 31 May; 21–24 Jun; 10–11 Jul; 9–12 Sep; 02 Oct | 300 | 37 | 4 |

TD – trapping dates, TE – trapping effort, trap-days, N – number of trapped small mammal individuals, S – number of species.

**Table S2.** Normality test results for distribution of  $\delta^{15}\text{N}$  and  $\delta^{13}\text{C}$  values (if  $n \leq 5$ , test not performed).

| Habitat        | Isotope               | <i>A. agrarius</i> |          | <i>A. flavicollis</i> |          | <i>M. arvalis</i> |          | <i>C. glareolus</i> |          |
|----------------|-----------------------|--------------------|----------|-----------------------|----------|-------------------|----------|---------------------|----------|
|                |                       | D                  | <i>p</i> | D                     | <i>p</i> | D                 | <i>p</i> | D                   | <i>p</i> |
| Homestead      | $\delta^{13}\text{C}$ |                    |          | 0.13                  | 0.21     | 0.09              | 0.99     | 0.08                | 0.84     |
|                | $\delta^{15}\text{N}$ |                    |          | 0.15                  | 0.12     | 0.16              | 0.69     | 0.14                | 0.21     |
| Kitchen garden | $\delta^{13}\text{C}$ | 0.40               | 0.14     | 0.36                  | 0.09     |                   |          | 0.26                | 0.50     |
|                | $\delta^{15}\text{N}$ | 0.19               | 0.93     | 0.20                  | 0.67     |                   |          | 0.21                | 0.73     |

D – Kolmogorov-Smirnov test result, *p* – significance of difference from normal distribution. In all cases, distributions are not different from the normal, as  $p > 0.05$ .

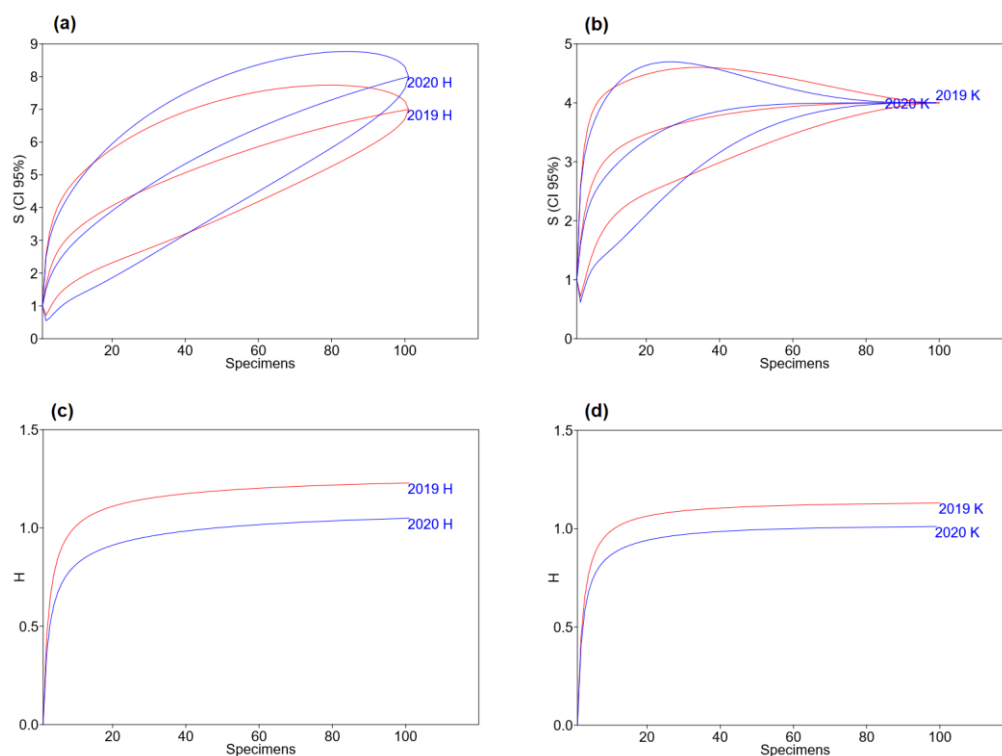

**Figure S1.** Small mammal species richness (S) and diversity (H) estimations, based on individual rarefaction, in the homestead (a,c) and kitchen garden (b,d) habitats.

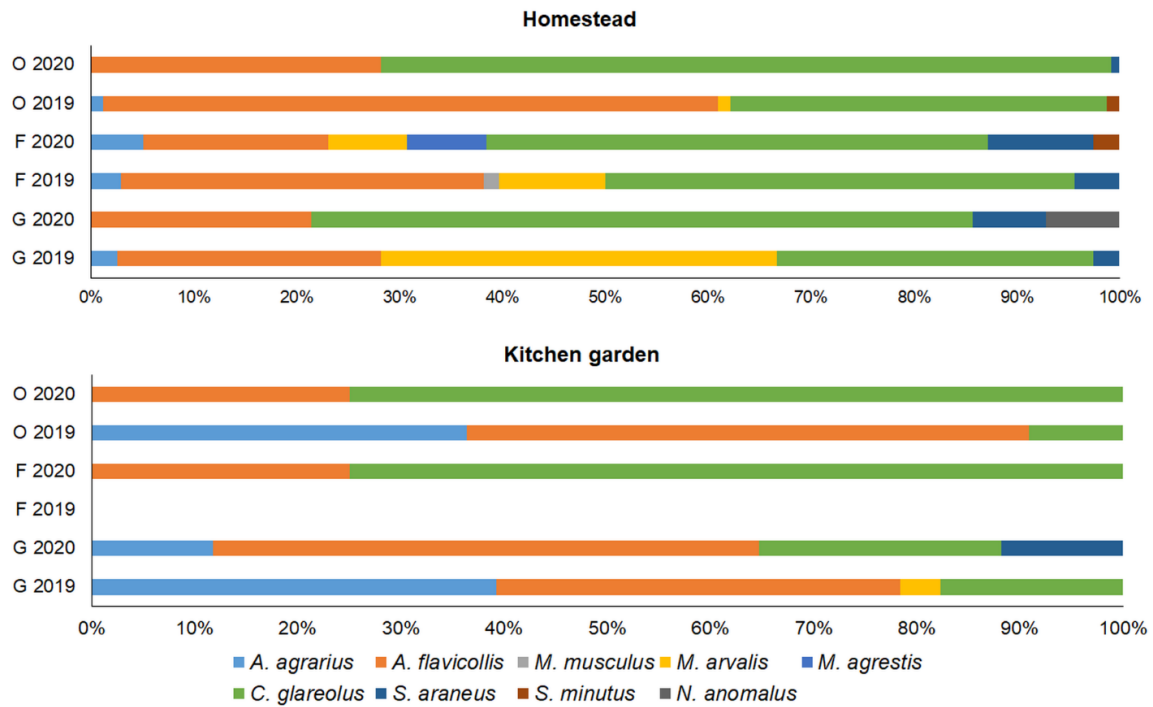

**Figure S2.** Changes in small mammal community composition in the gardens (G), buildings with food (F) and outbuildings without food (O) in the commensal habitats, 2019–2020.

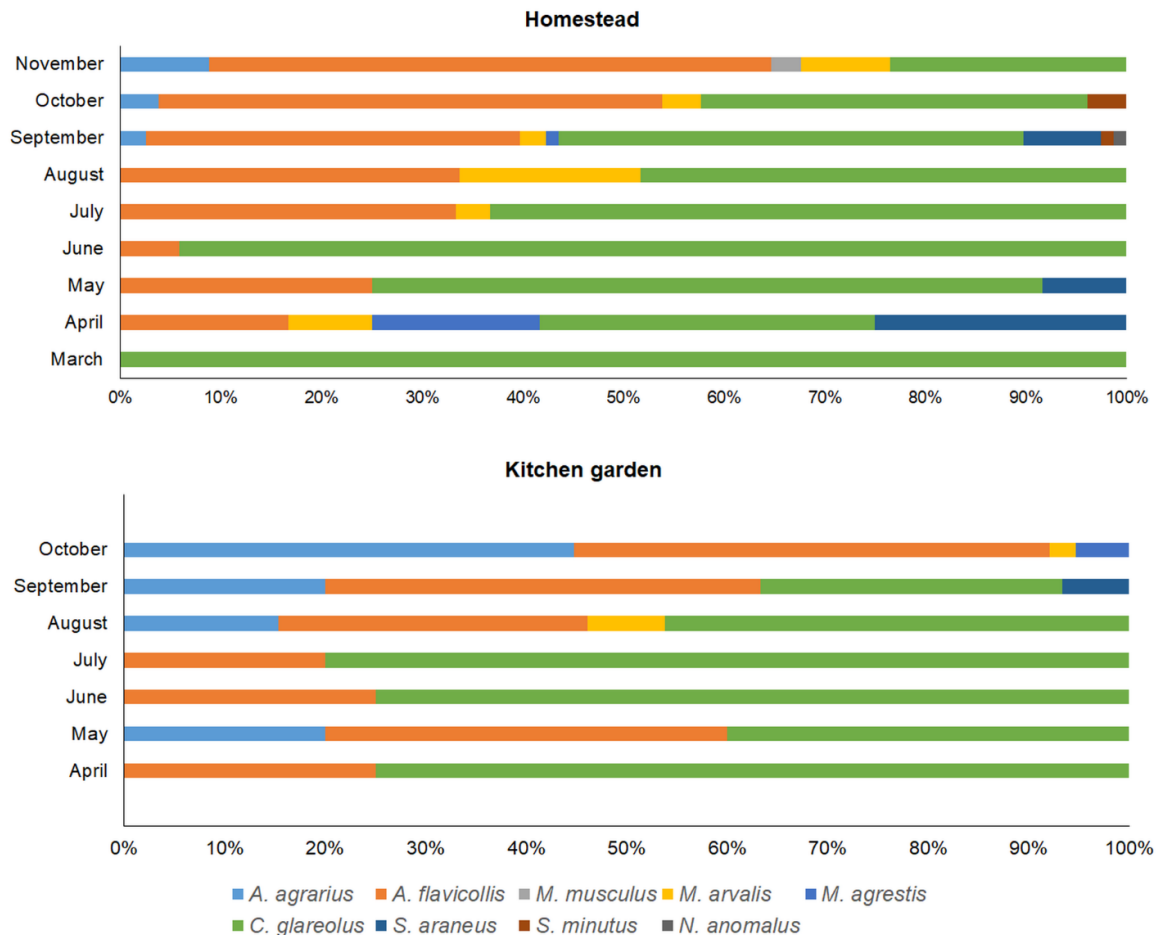

**Figure S3.** Temporal (monthly) changes in small mammal community composition in the commensal habitats, 2019–2020.

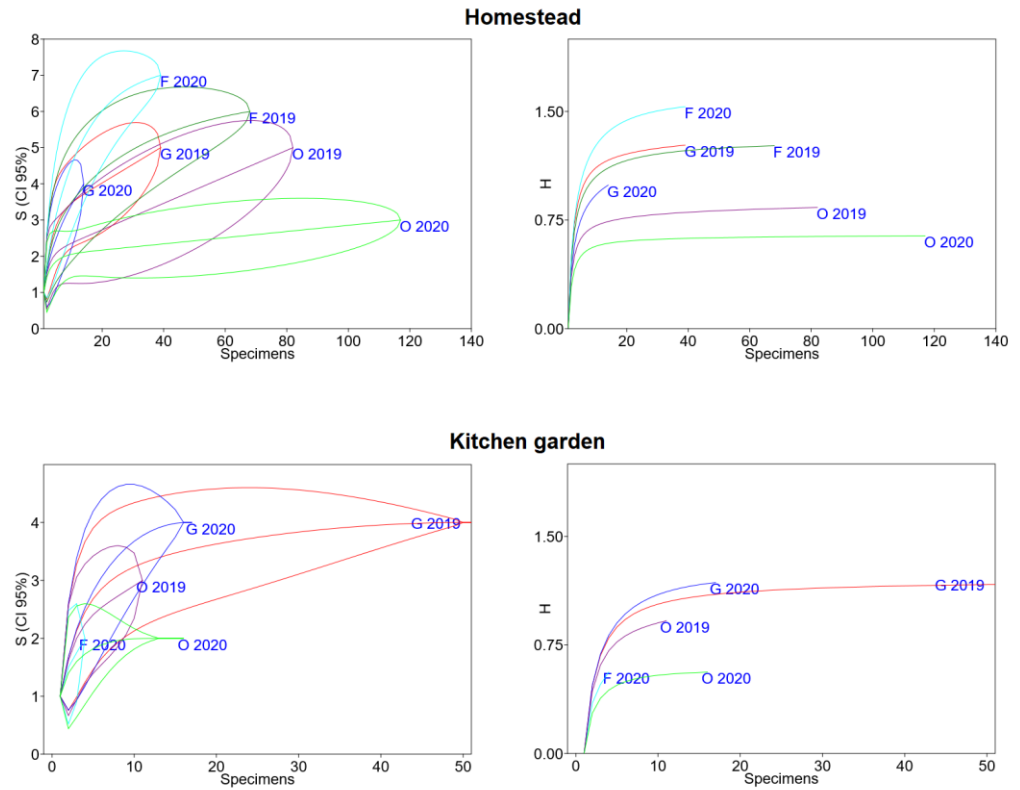

**Figure S4.** Temporal changes of individual rarefaction based on small mammal species richness (S) and diversity (H) estimations, in the gardens (G), buildings containing food (F) and outbuildings (O) of the homestead and kitchen garden habitats.

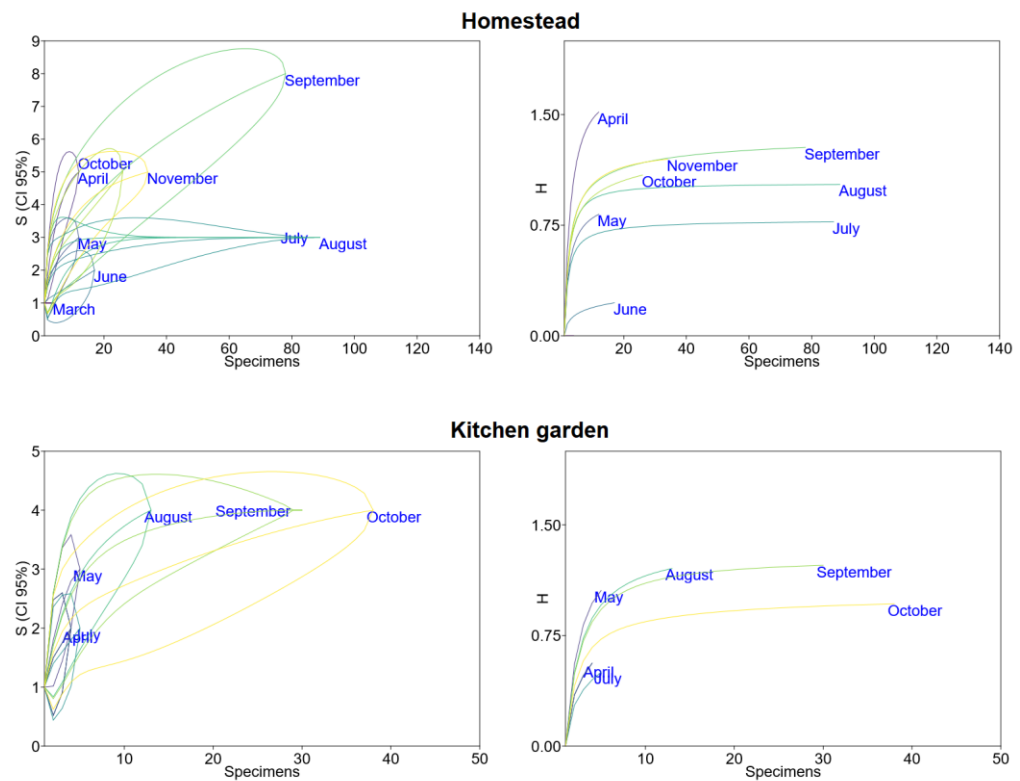

**Figure S5.** Monthly changes of small mammal species richness (S) and diversity (H) estimations in the homestead and kitchen garden habitats.
